# Supplementary material for: Optimized electron occupancy of solid-solution transition metals for suppressing the oxygen evolution of Li2MnO3
Source: Royal Society of Chemistry journal article supplement (doi:10.1039/d1ta00108f), 2021-01-01
Supplement: d1ta00108f1.pdf [file d1ta00108f1.pdf]

## Supporting Information

# **Optimized Electron Occupancy of Solid-Solution Transition Metal for Suppressing Oxygen Evolution of $\text{Li}_2\text{MnO}_3$**

*Erhong Song,<sup>1,a</sup> Yifan Hu,<sup>1,a</sup> Ruguang Ma,<sup>a\*</sup> Yining Li,<sup>a</sup> Xiaolin Zhao,<sup>a</sup> Jiacheng Wang,<sup>a</sup> Jianjun  
Liu,<sup>a,b,c\*</sup>*

<sup>a</sup> State Key Laboratory of High Performance Ceramics and Superfine Microstructure, Shanghai Institute of Ceramics, Chinese Academy of Sciences, 1295 Dingxi Road, Shanghai 200050, China

<sup>b</sup> Center of Materials Science and Optoelectronics Engineering, University of Chinese Academy of Sciences, Beijing 100049, China

<sup>c</sup> School of Chemistry and Materials Science, Hangzhou Institute for Advanced Study, University of Chinese Academy of Sciences, 1 Sub-lane Xiangshan, Hangzhou 310024, China

<sup>1</sup> These authors contributed equally to this work. All authors have given approval to the final version of the manuscript.

Corresponding mail: [jliu@mail.sic.ac.cn](mailto:jliu@mail.sic.ac.cn); [maruguang@mail.sic.ac.cn](mailto:maruguang@mail.sic.ac.cn)

## Supporting Data

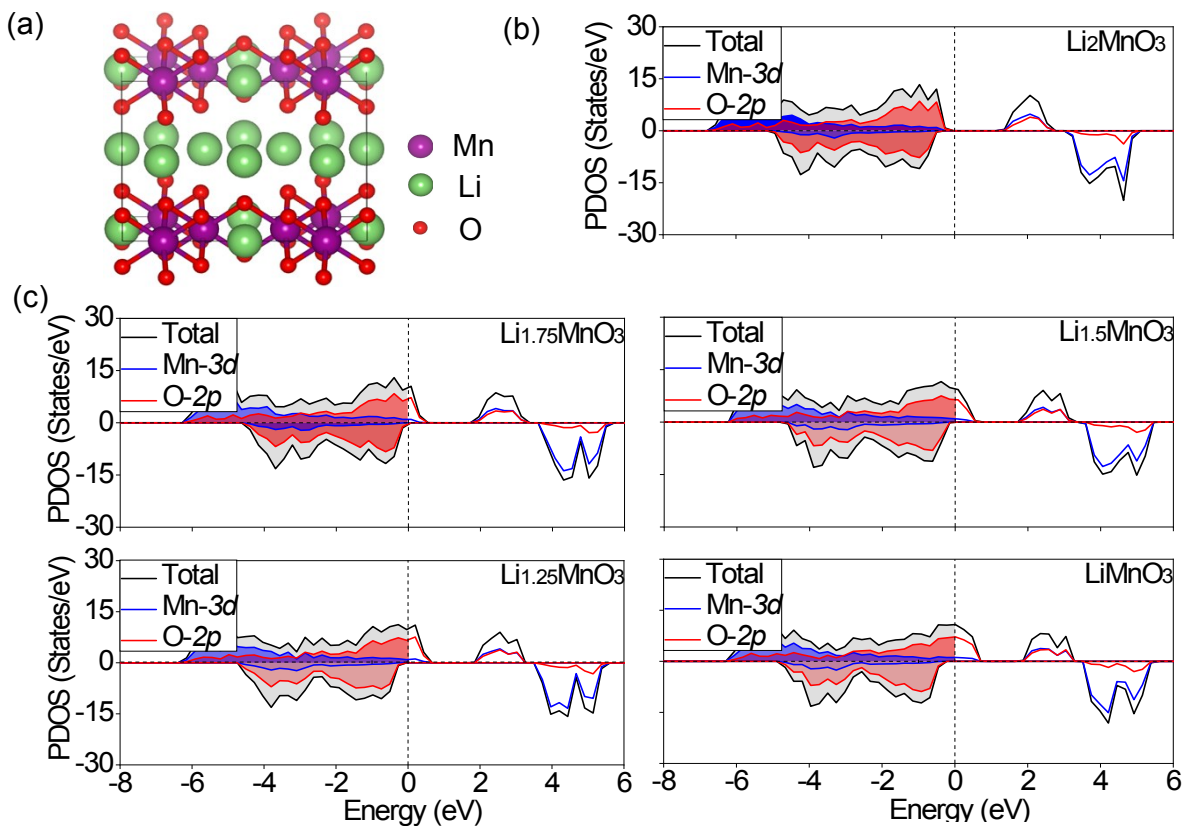

**Fig. S1.** Monoclinic ( $C2/m$ ) and electronic structure of Li-rich layer oxide  $\text{Li}_2\text{MnO}_3$ . (a) Atomic models of the monoclinic  $\text{Li}_2\text{MnO}_3$  structure. Green spheres are Li, purple spheres are Mn, and small red spheres are O. (b) Density of states of the fully relaxed  $\text{Li}_2\text{MnO}_3$  for the  $3d$ -orbital of the Mn ion and the  $2p$ -orbital of the surrounding O ions. (c) Density of states of the ground state structure of  $\text{Li}_y\text{MnO}_3$  ( $y = 1.75, 1.5, 1.25, \text{ and } 1$ ) determined by the “supercell” software package

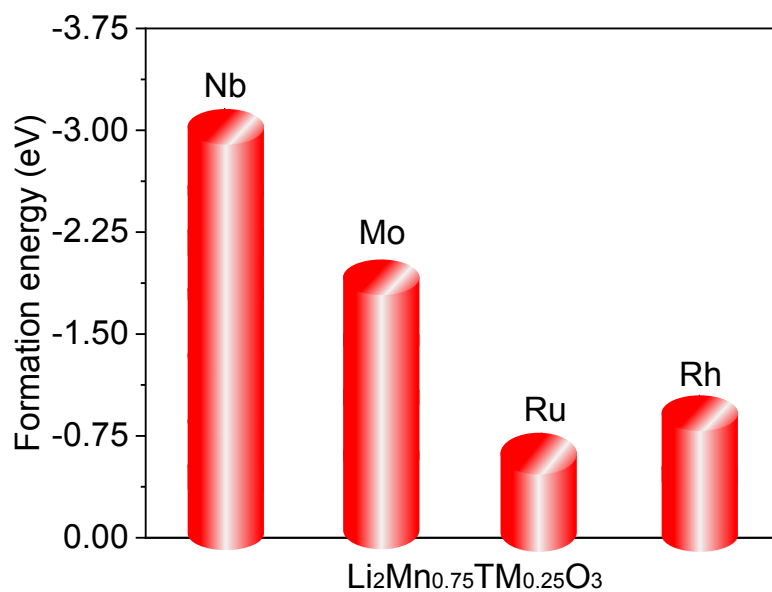

**Fig. S2.** The formation energies of proposed configurations of  $\text{Li}_2\text{Mn}_{0.75}\text{TM}_{0.25}\text{O}_3$ . The formation energies are calculated as  $E_f = E(\text{Li}_2\text{Mn}_{0.75}\text{TM}_{0.25}\text{O}_3) - E(\text{Li}_2\text{Mn}_{0.75}\square_{0.25}\text{O}_3) - 0.25E(\text{TM})$  (TM= Nb, Mo, Ru and Rh,  $\square$  = TM vacancy).

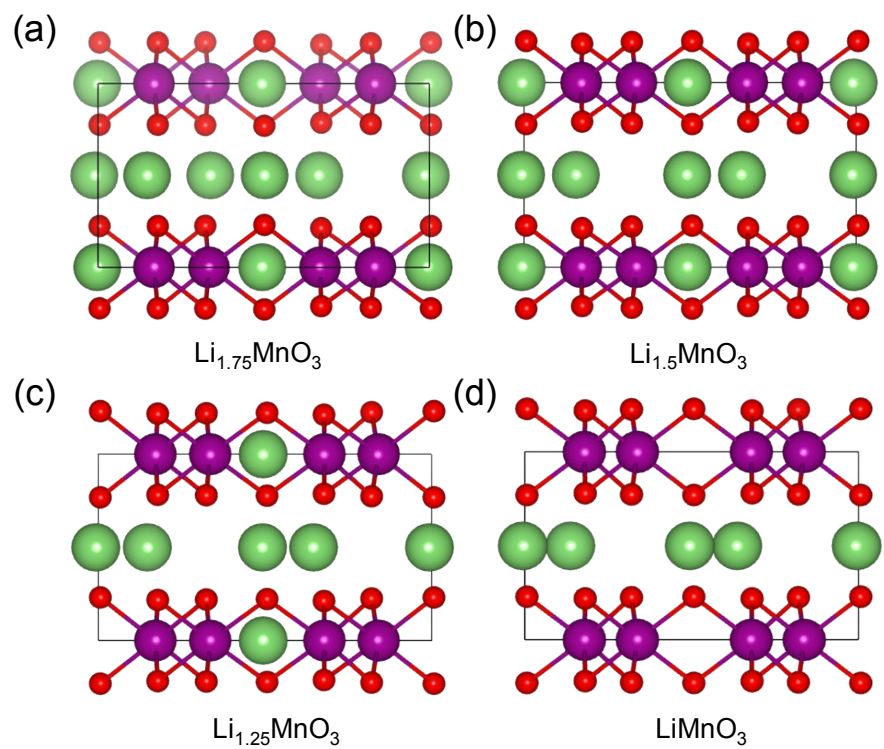

**Fig. S3.** The optimized structure of  $\text{Li}_y\text{MnO}_3$  ( $y = 1.75, 1.5, 1.25, \text{ and } 1$ ) determined by the “supercell” software package.

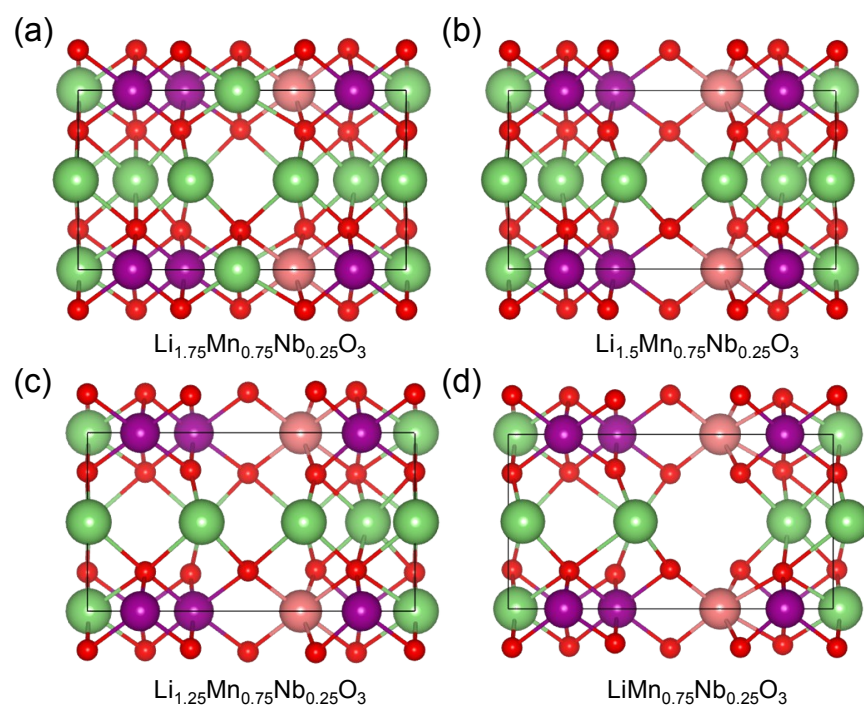

**Fig. S4.** The optimized structure of  $\text{Li}_y\text{Mn}_{0.75}\text{Nb}_{0.25}\text{O}_3$  ( $y = 1.75, 1.5, 1.25, \text{ and } 1$ ) determined by the “supercell” software package.

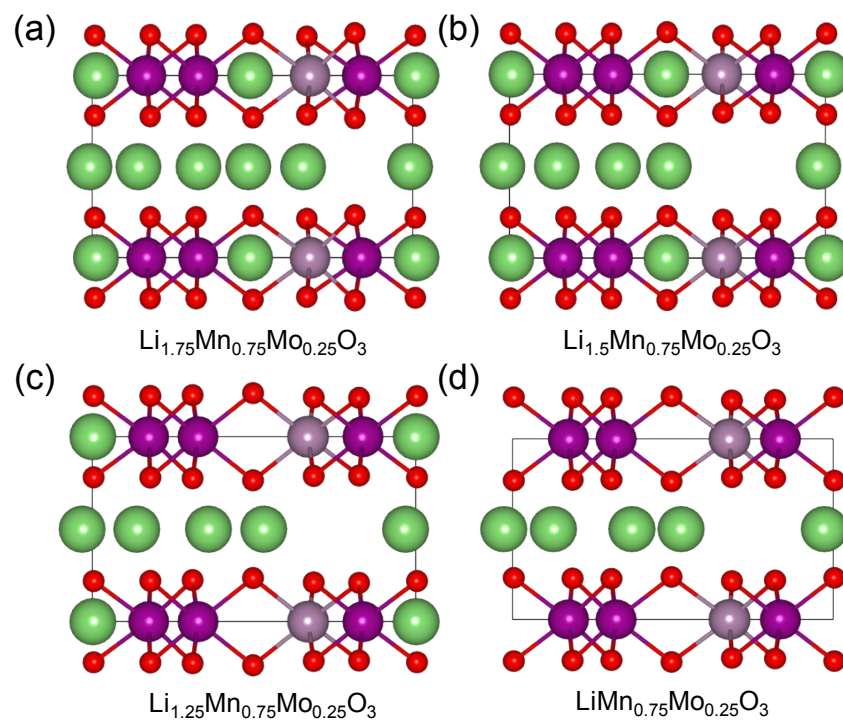

**Fig. S5.** The optimized structure of  $\text{Li}_y\text{Mn}_{0.75}\text{Mo}_{0.25}\text{O}_3$  ( $y = 1.75, 1.5, 1.25,$  and  $1$ ) determined by the “supercell” software package.

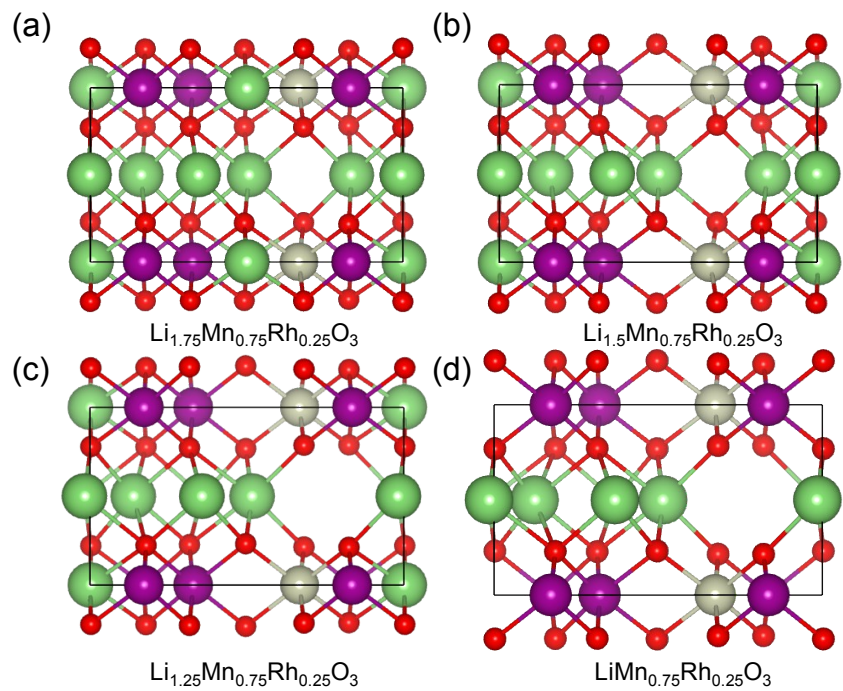

**Fig. S6.** The optimized structure of  $\text{Li}_y\text{Mn}_{0.75}\text{Rh}_{0.25}\text{O}_3$  ( $y = 1.75, 1.5, 1.25, \text{ and } 1$ ) determined by the “supercell” software package.

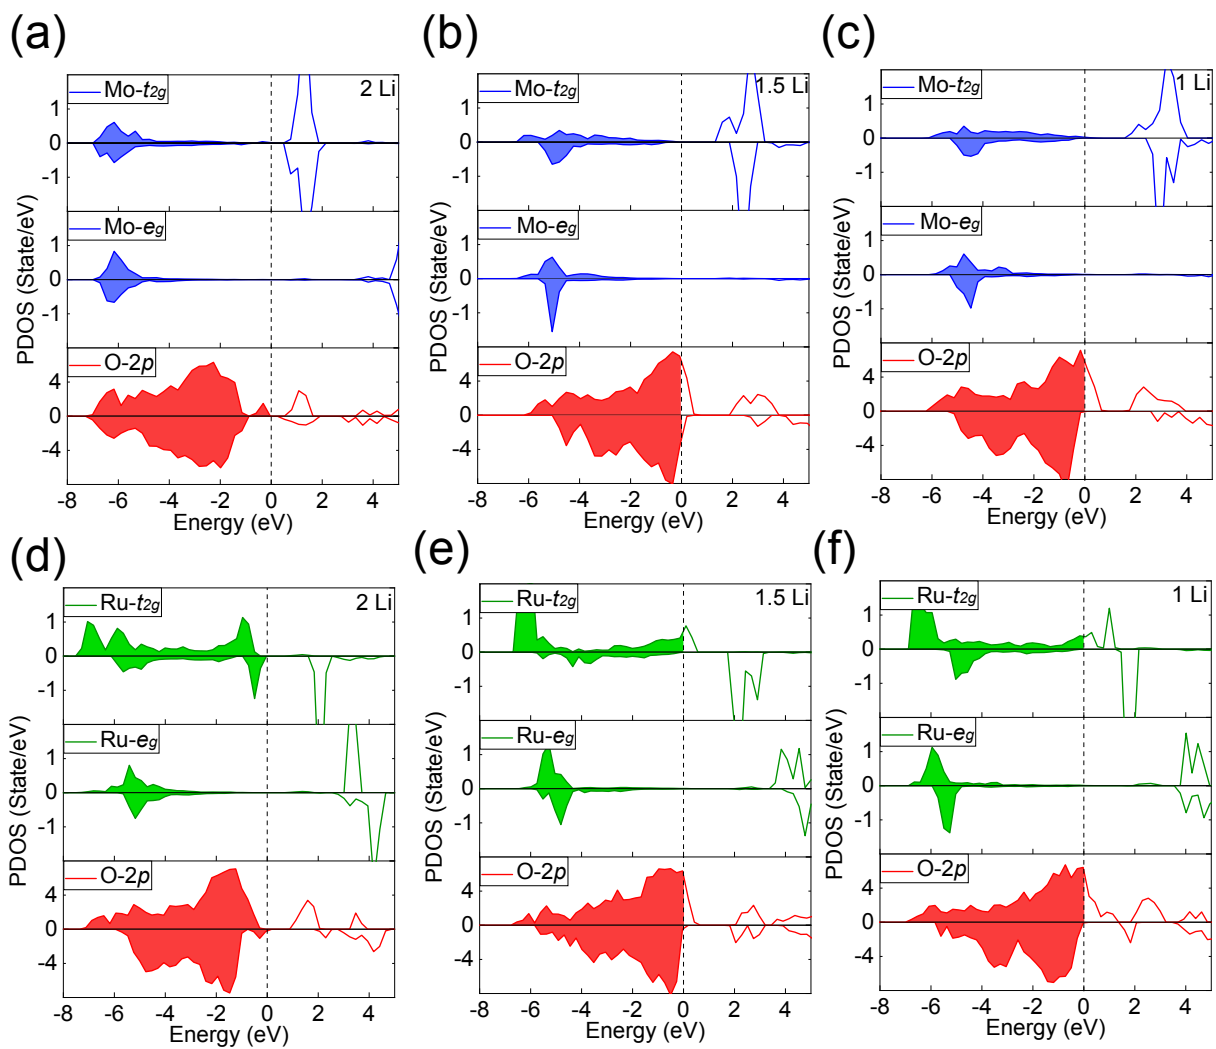

**Fig. S7.** Calculated density of states of  $t_{2g}$  ( $d_{xy}$ ,  $d_{yz}$ ,  $d_{xz}$ ),  $e_g$  ( $d_{x^2-y^2}$ ,  $d_{x^2}$ ) of Mo-4d and Ru-4d orbital and O atoms-2p orbital of  $\text{Li}_y\text{Mn}_{0.75}\text{TM}_{0.25}\text{O}_3$  during the Li extraction (TM= Mo, Ru;  $y = 2, 1.5$  and 1).



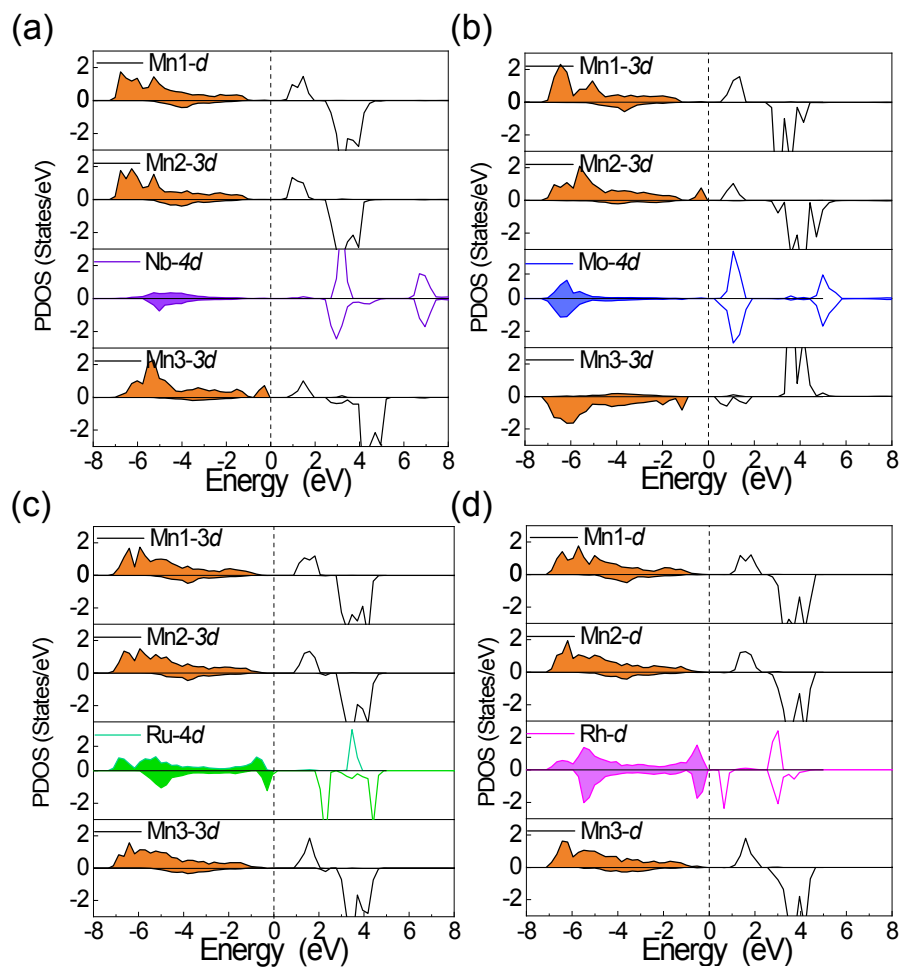

**Fig. S8.** Calculated projected density of states of the ground state structure of  $\text{Li}_2\text{Mn}_{0.75}\text{TM}_{0.25}\text{O}_3$  system (TM= Nb, Mo, Ru, Rh).

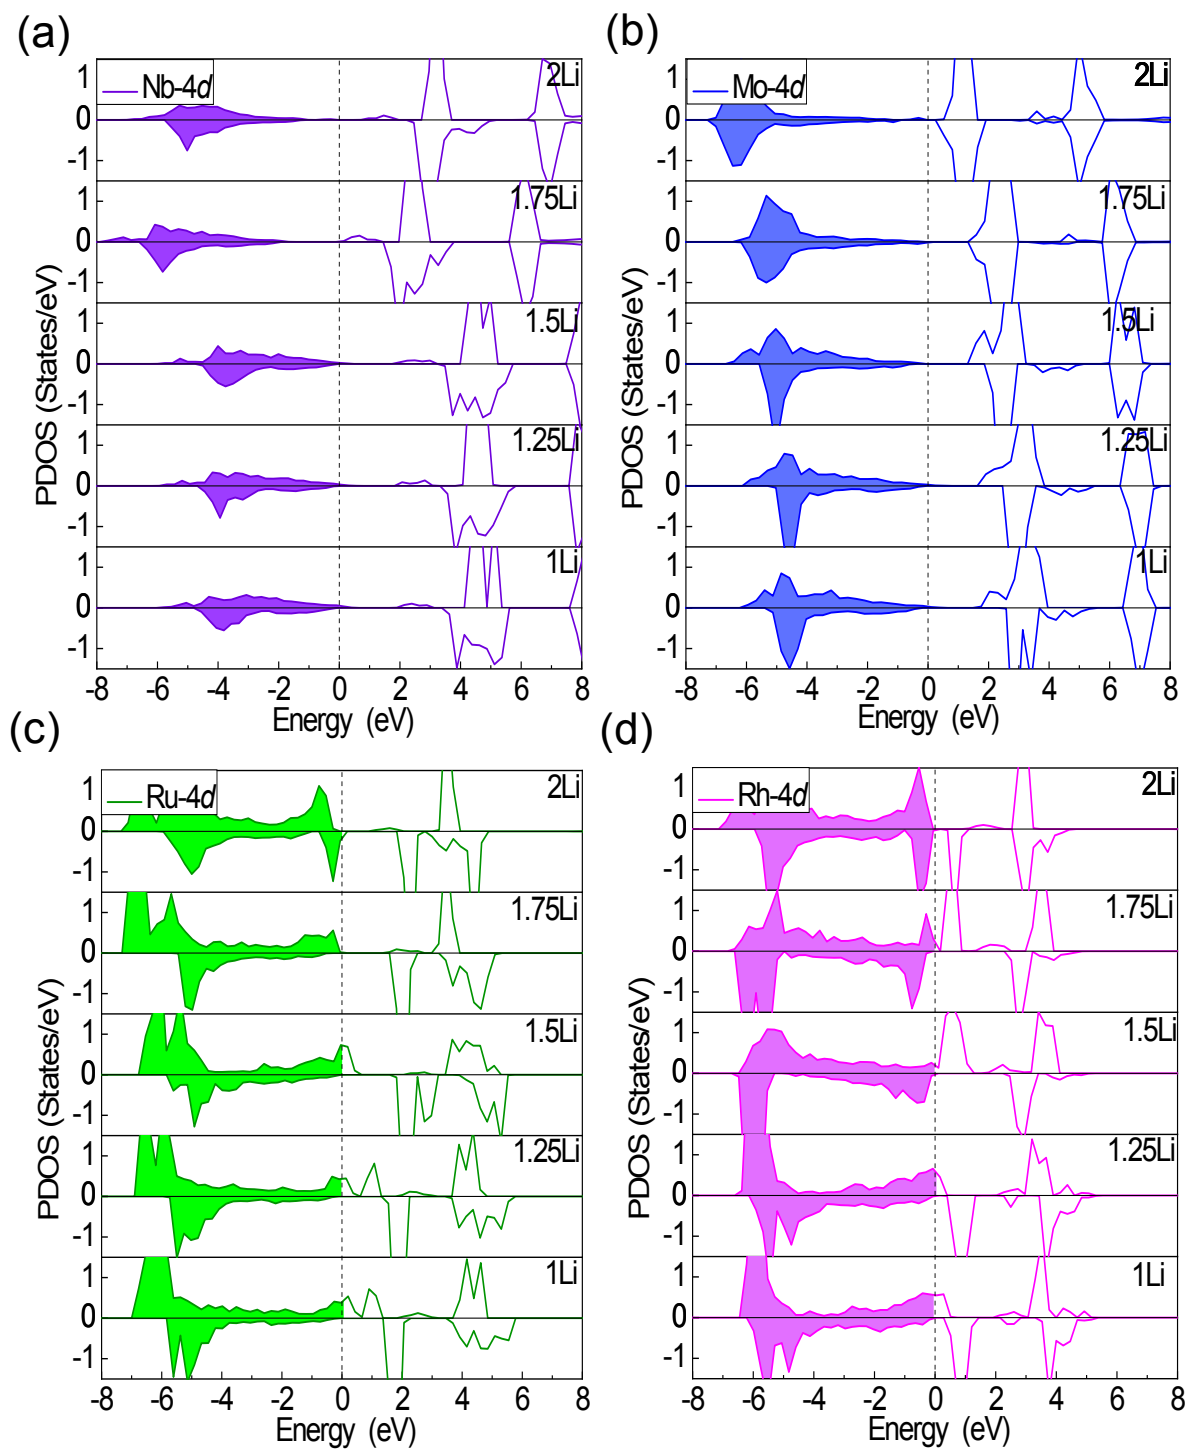

**Fig. S9.** Calculated projected density of states of the ground state structure of  $\text{Li}_y\text{Mn}_{0.75}\text{TM}_{0.25}\text{O}_3$  system in delithiation process (TM= Nb, Mo, Ru and Rh;  $y = 2, 1.75, 1.5, 1.25, \text{ and } 1$ ).

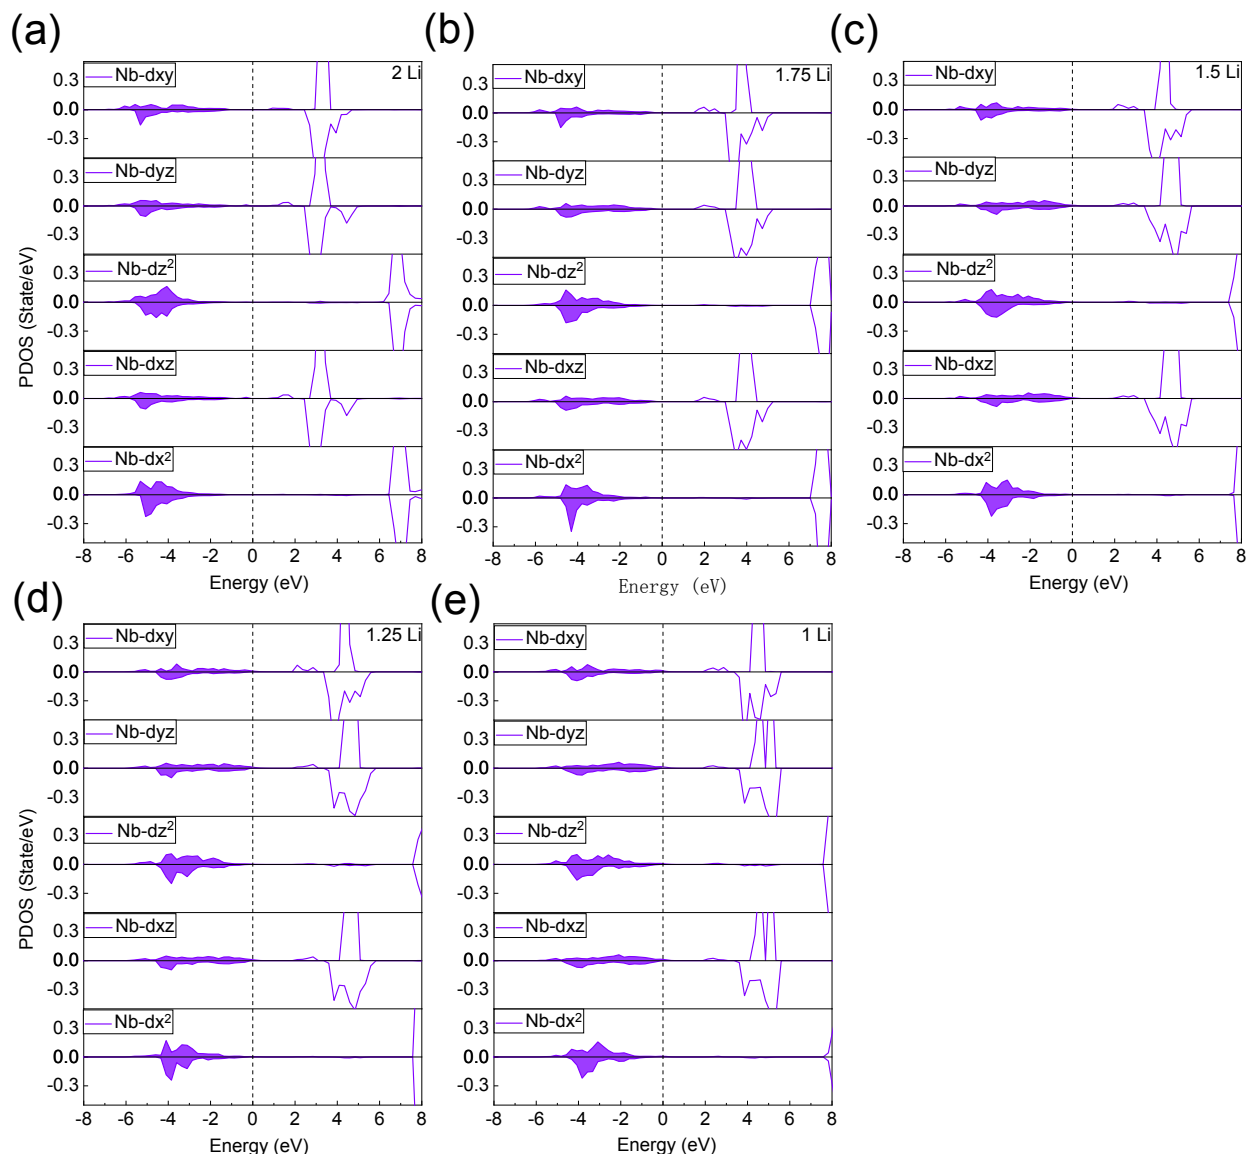

**Fig. S10.** Calculated projected density of states of  $t_{2g}$  ( $d_{xy}$ ,  $d_{yz}$ ,  $d_{xz}$ ) and  $e_g$  ( $d_{x^2-y^2}$ ,  $d_{x^2}$ ) of Nb-4d orbital of  $\text{Li}_y\text{Mn}_{0.75}\text{Nb}_{0.25}\text{O}_3$  during the Li extraction ( $y = 2, 1.75, 1.5, 1.25,$  and  $1$ ).

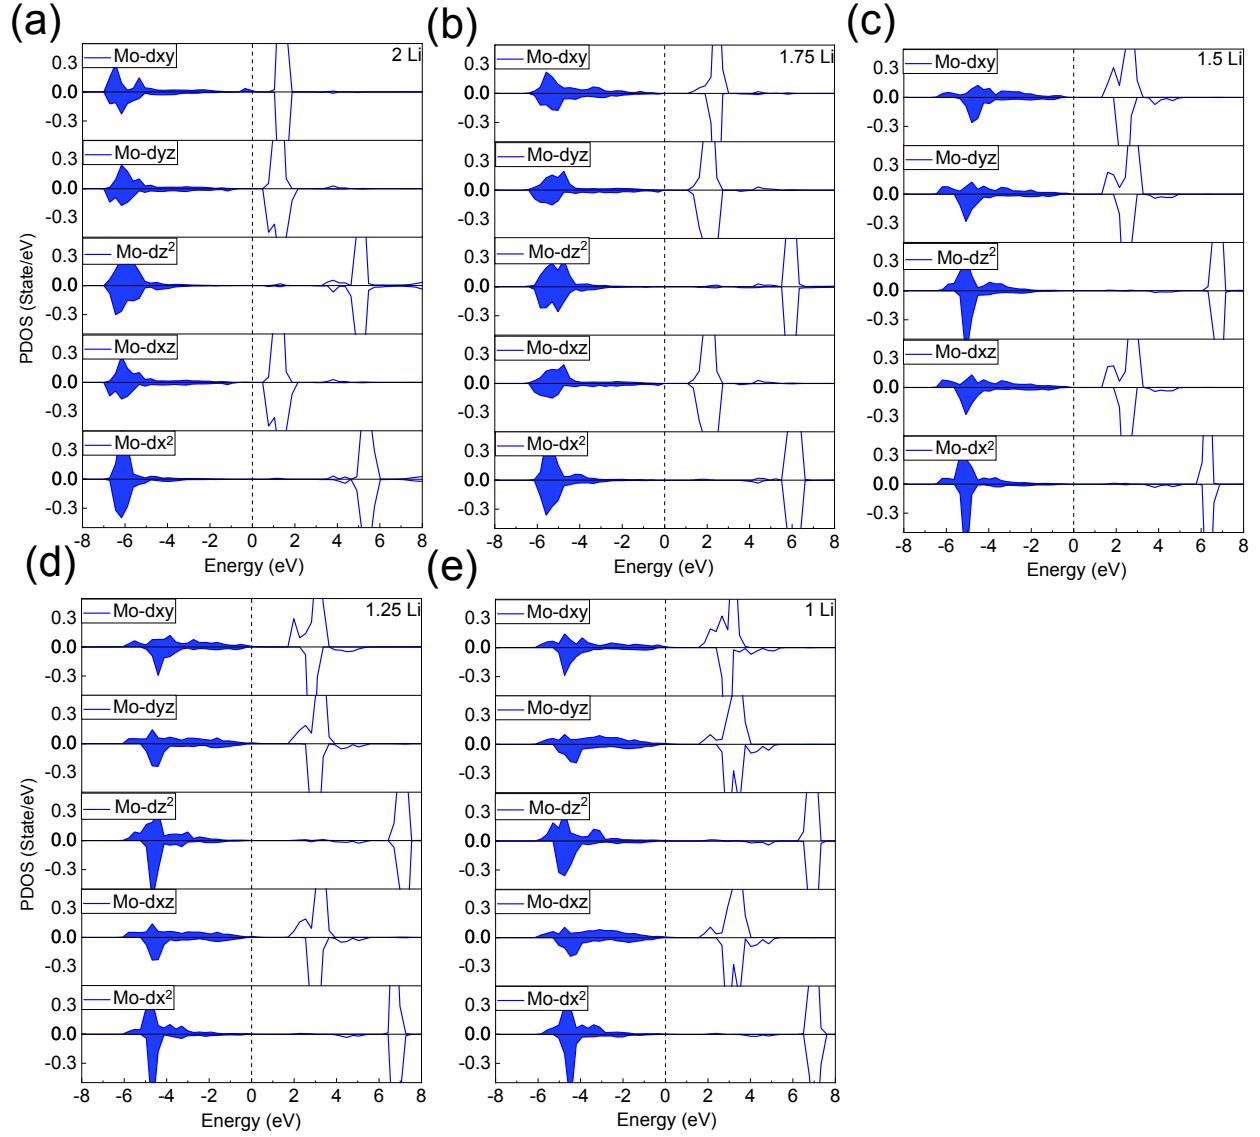

**Fig. S11.** Calculated projected density of states of  $t_{2g}$  ( $d_{xy}$ ,  $d_{yz}$ ,  $d_{xz}$ ) and  $e_g$  ( $d_{x^2-y^2}$ ,  $d_{x^2}$ ) of Mo-4d orbital of  $\text{Li}_y\text{Mn}_{0.75}\text{Mo}_{0.25}\text{O}_3$  during the Li extraction ( $y = 2, 1.75, 1.5, 1.25,$  and  $1$ ).

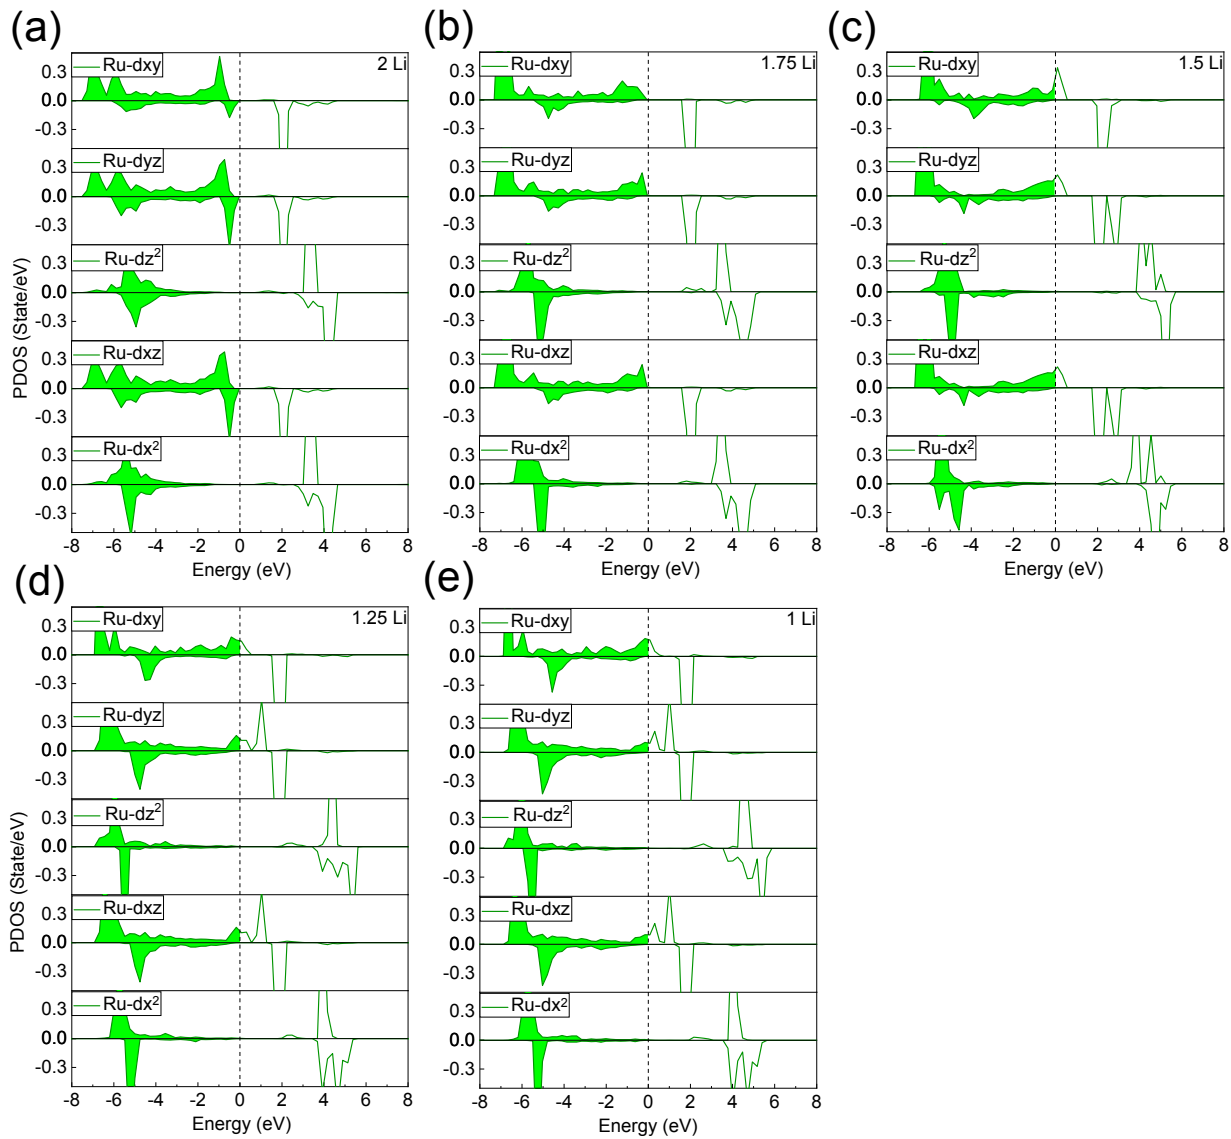

**Fig. S12.** Calculated projected density of states of  $t_{2g}$  ( $d_{xy}$ ,  $d_{yz}$ ,  $d_{xz}$ ) and  $e_g$  ( $d_{x^2-y^2}$ ,  $d_{x^2}$ ) of Ru-4d orbital of  $\text{Li}_y\text{Mn}_{0.75}\text{Ru}_{0.25}\text{O}_3$  during the Li extraction ( $y = 2, 1.75, 1.5, 1.25,$  and  $1$ ).

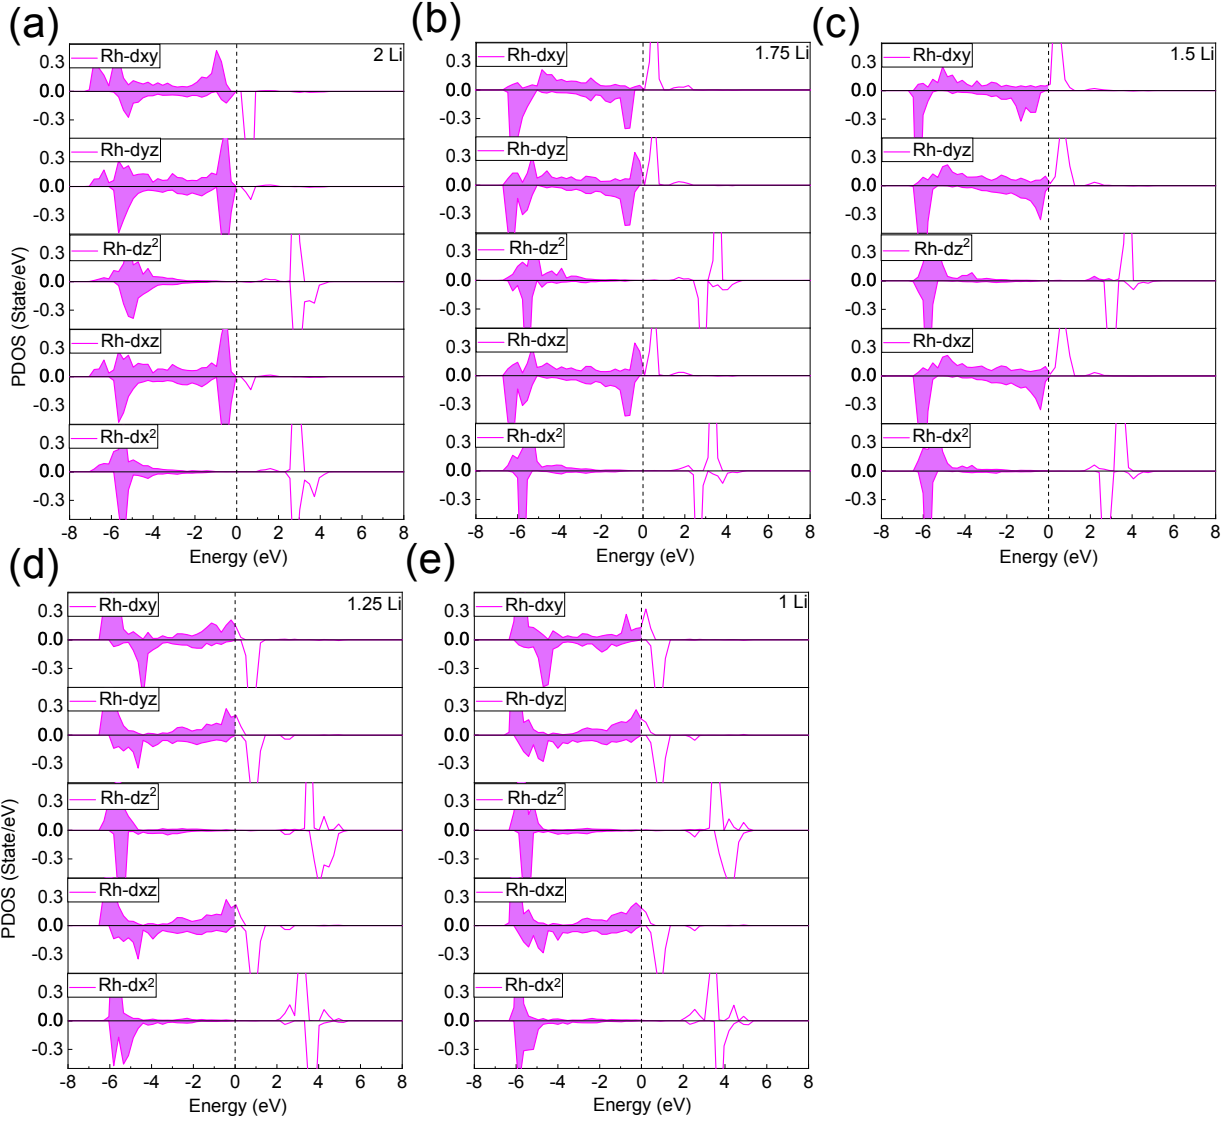

**Fig. S13.** Calculated projected density of states of  $t_{2g}$  ( $d_{xy}$ ,  $d_{yz}$ ,  $d_{xz}$ ) and  $e_g$  ( $d_{x^2-y^2}$ ,  $d_{x^2}$ ) of Rh-4d orbital of  $\text{Li}_y\text{Mn}_{0.75}\text{Rh}_{0.25}\text{O}_3$  during the Li extraction ( $y = 2, 1.75, 1.5, 1.25,$  and  $1$ ).

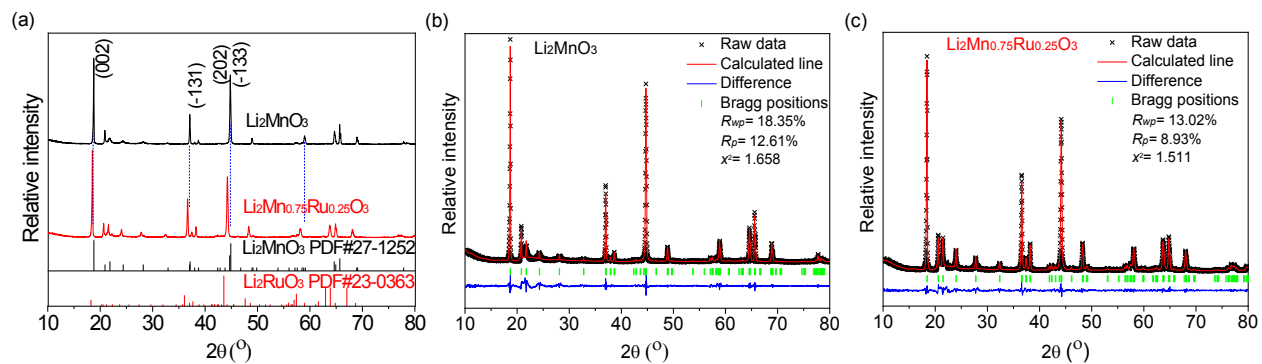

Fig. S14 (a) XRD patterns of  $\text{Li}_2\text{MnO}_3$  (black line) and  $\text{Li}_2\text{Mn}_{0.75}\text{Ru}_{0.25}\text{O}_3$  (red line). Rietveld refinement XRD pattern of  $\text{Li}_2\text{MnO}_3$  (b) and  $\text{Li}_2\text{Mn}_{0.75}\text{Ru}_{0.25}\text{O}_3$  (c), respectively.

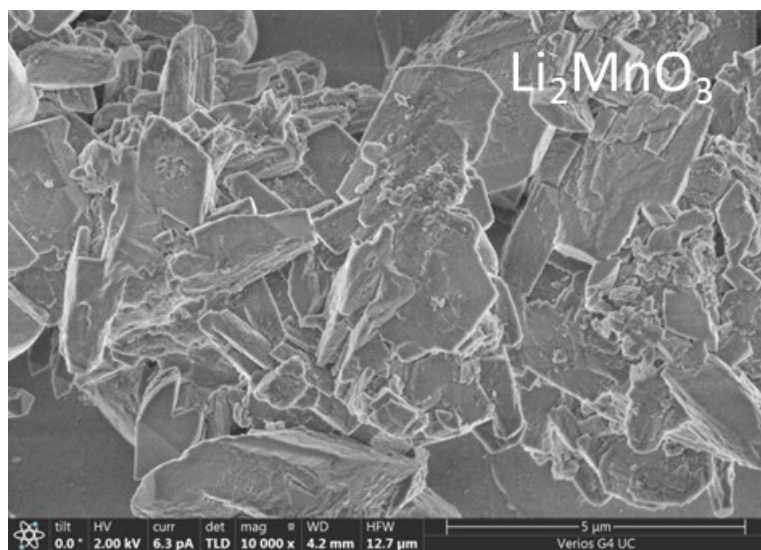

**Fig. S15.** SEM image of Li<sub>2</sub>MnO<sub>3</sub>.



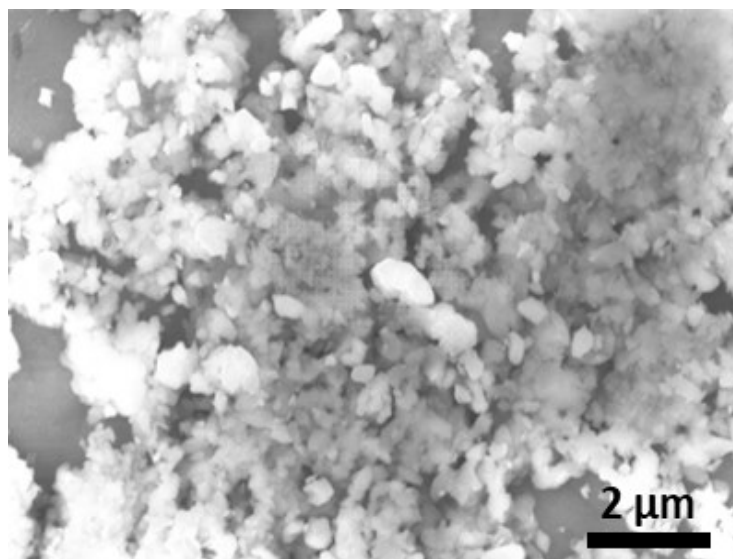

**Fig. S16.** SEM image of  $\text{Li}_2\text{Mn}_{0.75}\text{Ru}_{0.25}\text{O}_3$ .

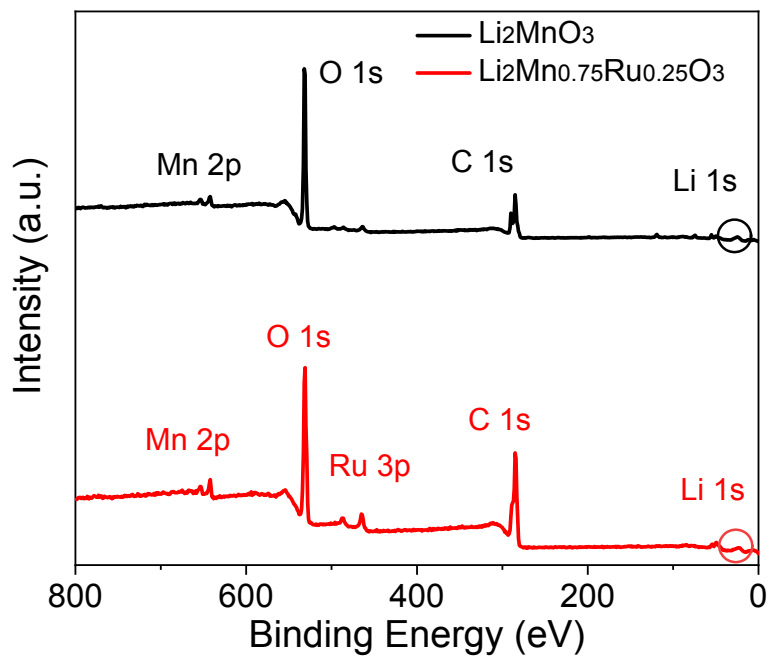

**Fig. S17.** Survey XPS spectra of  $\text{Li}_2\text{MnO}_3$  and  $\text{Li}_2\text{Mn}_{0.75}\text{Ru}_{0.25}\text{O}_3$ , respectively.

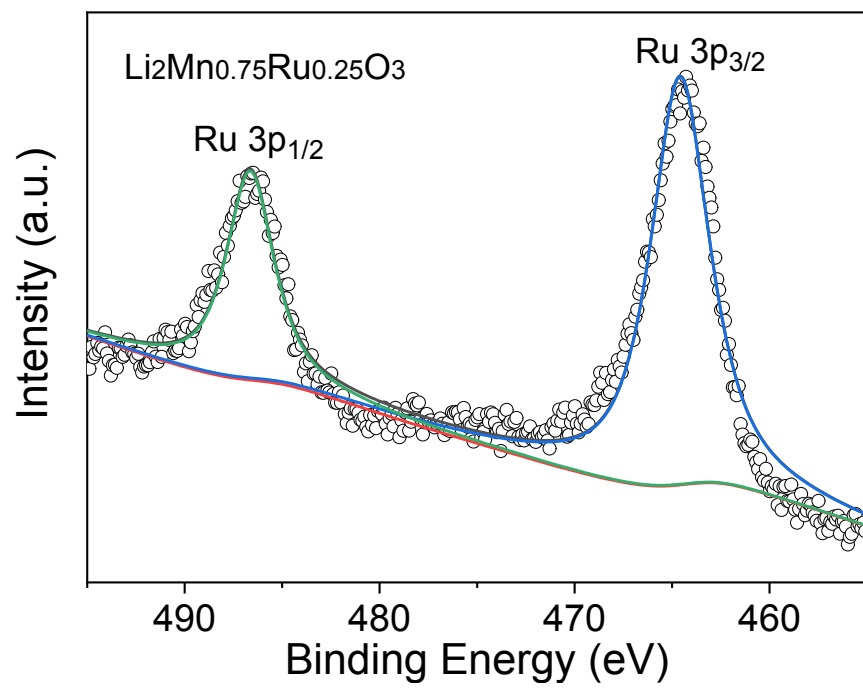

**Fig. S18.** Survey XPS spectra of  $\text{Li}_2\text{Mn}_{0.75}\text{Ru}_{0.25}\text{O}_3$ .

Table S1 The lattice parameters of  $\text{Li}_2\text{MnO}_3$  and  $\text{Li}_2\text{Mn}_{0.75}\text{Ru}_{0.25}\text{O}_3$  compound.

| Sample                                                  | a     | b     | c     | $\alpha$ | $\beta$ | $\gamma$ | V       |
|---------------------------------------------------------|-------|-------|-------|----------|---------|----------|---------|
| $\text{Li}_2\text{MnO}_3$                               | 4.928 | 8.530 | 5.025 | 90       | 109.204 | 90       | 199.484 |
| $\text{Li}_2\text{Mn}_{0.75}\text{Ru}_{0.25}\text{O}_3$ | 4.982 | 8.623 | 5.089 | 90       | 109.138 | 90       | 206.538 |
